# Supplementary material
Source: PubMed Central journal article supplement (PMC55542)

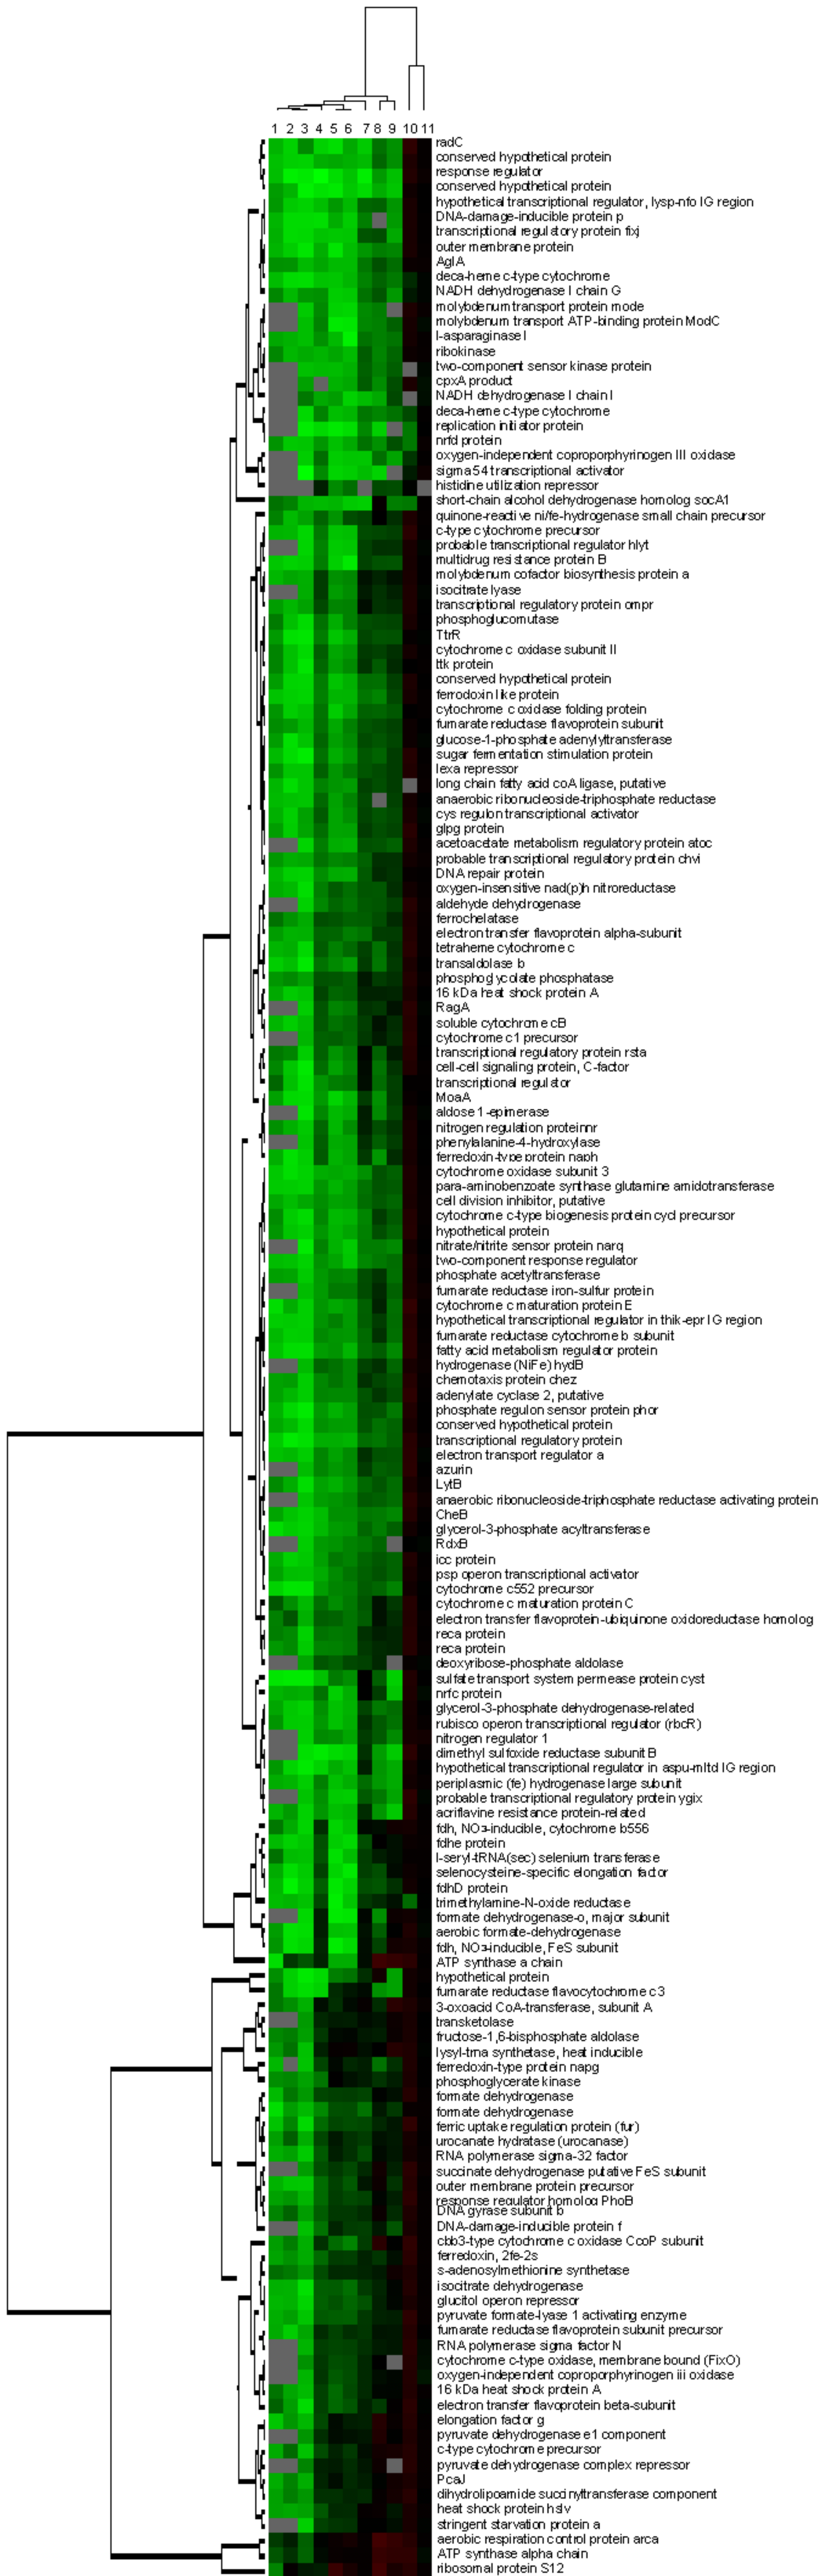

Supplement: pnas_171178898_3.pdf [file pnas_171178898_3.pdf]
